# Supplementary material for: Long‐Term Survival of Patients With Left Ventricular Noncompaction
Source: PubMed Central journal article supplement — J Am Heart Assoc. 2021 Jan 14;10(2):e015563. doi: 10.1161/JAHA.119.015563 (PMC7955291; doi:10.1161/jaha.119.015563), 2021-01-14
Supplement: JAH3-10-e015563-s001.pdf [file JAH3-10-e015563-s001.pdf]

# **Supplemental Material**

**Table S1. Comparison of clinical characteristics of LVNC patients with and without LA dilatation (left atrial volume index >34 ml/m<sup>2</sup>).**

| <b>Variables</b>                           | <b>LA dilatation present (N=160)</b> | <b>LA dilatation absent (N=160)</b> | <b>p-value</b> |
|--------------------------------------------|--------------------------------------|-------------------------------------|----------------|
| Age (years)                                | 56 (44-65)                           | 39 (28-51)                          | <0.001         |
| Female sex                                 | 64 (40%)                             | 84 (79%)                            | 0.025          |
| Hypertension                               | 64 (40%)                             | 34 (21%)                            | <0.001         |
| Diabetes mellitus                          | 23 (14%)                             | 16 (10%)                            | 0.23           |
| Smoking                                    | 55 (34%)                             | 44 (28%)                            | 0.18           |
| Stroke/TIA                                 | 13 (8%)                              | 4 (3%)                              | 0.02           |
| Coronary artery disease                    | 35 (22%)                             | 11 (7%)                             | <0.001         |
| Congestive heart failure                   | 63 (39%)                             | 31 (19%)                            | <0.001         |
| Left Ventricular Ejection fraction (%)     | 36 (23-51)                           | 53 (40-60)                          | <0.001         |
| Left ventricular ejection fraction <50%    | 114 (71%)                            | 68 (43%)                            | <0.001         |
| Atrial fibrillation/flutter                | 55 (34%)                             | 18 (11%)                            | <0.001         |
| Any cardiovascular implantable device      | 29 (18%)                             | 25 (16%)                            | 0.55           |
| Asymptomatic at presentation               | 33 (21%)                             | 52 (33%)                            | 0.017          |
| <b>Echocardiographic variables</b>         |                                      |                                     |                |
| Left ventricular end diastolic diameter    | 59 (53-65)                           | 51 (48-57)                          | <0.001         |
| Left ventricular end systolic diameter     | 48 (38-56)                           | 36 (32-43)                          | <0.001         |
| Right ventricular systolic pressure (mmHg) | 34 (28-49)                           | 26 (24-31)                          | <0.001         |

|                                                                                                         |                  |                  |        |
|---------------------------------------------------------------------------------------------------------|------------------|------------------|--------|
| Any RV enlargement                                                                                      | 54 (34%)         | 27 (17%)         | <0.001 |
| Any RV dysfunction                                                                                      | 58 (37%)         | 28 (18%)         | <0.001 |
| Moderate or greater mitral regurgitation                                                                | 34 (22%)         | 7 (5%)           | <0.001 |
| Increased LV wall thickness (LV mass index >95 gm/m <sup>2</sup> : women; >115 gm/m <sup>2</sup> : men) | 105 (66%)        | 53 (33%)         | <0.001 |
| Minimum systolic compacta thickness (mm)                                                                | 6 (5-7)          | 6 (5-6)          | 0.015  |
| Maximum systolic noncompacta thickness (mm)                                                             | 19 (17-22)       | 17 (14-20)       | <0.001 |
| Maximum end systolic NC:C ratio (Jenni criteria)                                                        | 2.8 (2.5-3.4)    | 2.8 (2.4-3.2)    | 0.45   |
| Minimum end diastolic X:Y ratio (Chin criteria, per 0.1 unit increase in the ratio)                     | 0.26 (0.22-0.29) | 0.26 (0.22-0.30) | 0.27   |
| Number of segments involved                                                                             | 2 (1-3)          | 1 (1-3)          | 0.03   |
| Isolated apical noncompaction                                                                           | 71 (44%)         | 84 (53%)         | 0.14   |
| Delayed gadolinium enhancement on MRI                                                                   | 11 (24%)         | 6 (10%)          | 0.048  |

## **Supplemental Video Legends:**

**Video S1. Left ventricular noncompaction patient with mid-basal noncompaction extent.**

NC:C and X:Y ratios met for segments extending beyond the apical segment. Best viewed with Windows Media Player.

**Video S2. Left ventricular noncompaction patient with isolated apical noncompaction**

**extent.** NC:C and X:Y ratios met for only the apical segment. Best viewed with Windows Media Player.
